# Supplementary material for: Variable locus length in the human genome leads to ascertainment bias in functional inference for non-coding elements
Source: PubMed Central journal article supplement — Bioinformatics. 2009 Jan 25;25(5):578–84. doi: 10.1093/bioinformatics/btp043 (PMC2647827; doi:10.1093/bioinformatics/btp043), 2009-01-25
Supplement: btp043_1.pdf [file btp043_1.pdf]

# 1 SUPPLEMENTARY MATERIAL

## Suppl. Table 1: Correction Coefficients.

<http://www.ncbi.nlm.nih.gov/CBBresearch/Fellows/Taher/GOCC/GOCC.txt>

<http://www.ncbi.nlm.nih.gov/CBBresearch/Fellows/Taher/GOCC/readme.txt>

## Suppl. Table 2. Genes annotated to the “hemophilic cell adhesion” GO category.

Noncoding non-repetitive (ncnr) locus length is given in the last column.

| ID | Location                  | Gene   | Locus length | Ncnr DNA length |
|----|---------------------------|--------|--------------|-----------------|
| 0  | chr1:9711667-9807137      | CLSTN1 | 95471        | 56026           |
| 1  | chr1:109594164-109619901  | CELSR2 | 25738        | 25890           |
| 2  | chr1:109850969-109853859  | AMIGO1 | 2891         | 26302           |
| 3  | chr1:157408044-157438425  | IGSF4B | 30382        | 75743           |
| 4  | chr1:158782419-158815887  | CD84   | 33469        | 30118           |
| 5  | chr1:159541151-159546377  | MPZ    | 5227         | 13536           |
| 6  | chr10:33229327-33287204   | ITGB1  | 57878        | 165637          |
| 7  | chr10:42892523-42945803   | RET    | 53281        | 165161          |
| 8  | chr10:55250866-56231057   | PCDH15 | 980192       | 1823029         |
| 9  | chr10:72826697-73076543   | CDH23  | 249847       | 243018          |
| 10 | chr11:606577-615007       | MUCDHL | 8431         | 5598            |
| 11 | chr11:6599134-6633650     | DCHS1  | 34517        | 26400           |
| 12 | chr11:91724910-92269283   | FAT3   | 544374       | 1412575         |
| 13 | chr11:114549555-114880451 | CADM1  | 330897       | 1259828         |
| 14 | chr11:117629345-117640219 | EVA1   | 10875        | 18823           |
| 15 | chr11:119014018-119104645 | PVRL1  | 90628        | 402459          |
| 16 | chr11:124128229-124137433 | ESAM   | 9205         | 11153           |
| 17 | chr12:7174234-7202795     | CLSTN3 | 28562        | 32323           |
| 18 | chr12:45755757-45759915   | AMIGO2 | 4159         | 174663          |
| 19 | chr12:54364623-54387894   | ITGA7  | 23272        | 18465           |
| 20 | chr13:38159173-38359267   | FREM2  | 200095       | 321073          |
| 21 | chr13:52316112-52320775   | PCDH8  | 4664         | 170660          |
| 22 | chr13:57103790-57201066   | PCDH17 | 97277        | 1334655         |
| 23 | chr13:60881822-60887282   | PCDH20 | 5461         | 2797661         |
| 24 | chr13:65774968-66702464   | PCDH9  | 927497       | 4344407         |
| 25 | chr14:22586710-22594875   | CDH24  | 8166         | 10066           |
| 26 | chr15:71639411-71712806   | NPTN   | 73396        | 70774           |
| 27 | chr16:2078712-2125900     | PKD1   | 47189        | 29260           |
| 28 | chr16:60244736-60627537   | CDH8   | 382802       | 3212471         |
| 29 | chr16:63538186-63713420   | CDH11  | 175235       | 1702425         |
| 30 | chr16:64958064-64996189   | CDH5   | 38126        | 522781          |
| 31 | chr16:65499527-65510267   | CDH16  | 10741        | 20632           |
| 32 | chr16:67236277-67290442   | CDH3   | 54166        | 59098           |
| 33 | chr16:67328696-67426945   | CDH1   | 98250        | 59000           |

|    |                          |                                                                                                                                |         |         |
|----|--------------------------|--------------------------------------------------------------------------------------------------------------------------------|---------|---------|
| 34 | chr16:81218079-82387698  | CDH13                                                                                                                          | 1169620 | 940250  |
| 35 | chr16:87765664-87789400  | CDH15                                                                                                                          | 23737   | 38574   |
| 36 | chr18:23784934-24011189  | CDH2                                                                                                                           | 226256  | 1957946 |
| 37 | chr18:26824050-26876779  | DSC3                                                                                                                           | 52730   | 1428069 |
| 38 | chr18:26900005-26936375  | DSC2                                                                                                                           | 36371   | 53350   |
| 39 | chr18:26963214-26996817  | DSC1                                                                                                                           | 33604   | 121959  |
| 40 | chr18:27152050-27191391  | DSG1                                                                                                                           | 39342   | 118979  |
| 41 | chr18:27210738-27247877  | DSG4                                                                                                                           | 37140   | 58377   |
| 42 | chr18:27281730-27312663  | DSG3                                                                                                                           | 30934   | 54302   |
| 43 | chr18:27332170-27380754  | DSG2                                                                                                                           | 48585   | 63429   |
| 44 | chr18:57308755-57373345  | CDH20                                                                                                                          | 64591   | 790671  |
| 45 | chr18:61568468-61699154  | CDH7                                                                                                                           | 130687  | 1381750 |
| 46 | chr18:62322301-62422196  | CDH19                                                                                                                          | 99896   | 852894  |
| 47 | chr19:47703299-47724479  | CEACAM1                                                                                                                        | 21181   | 52603   |
| 48 | chr19:50041233-50084325  | PVRL2                                                                                                                          | 43093   | 25407   |
| 49 | chr20:44235783-44313741  | CDH22                                                                                                                          | 77959   | 118820  |
| 50 | chr20:57966877-58021562  | CDH26                                                                                                                          | 54686   | 55061   |
| 51 | chr20:59260954-59945694  | CDH4                                                                                                                           | 684741  | 1185443 |
| 52 | chr22:45135395-45311731  | CELSR1                                                                                                                         | 176337  | 161794  |
| 53 | chr3:48638160-48647930   | SLC26A6                                                                                                                        | 9771    | 9617    |
| 54 | chr3:48648900-48675352   | CELSR3                                                                                                                         | 26453   | 20500   |
| 55 | chr3:77171984-77779351   | ROBO2                                                                                                                          | 607368  | 2301405 |
| 56 | chr3:78729080-79721751   | ROBO1                                                                                                                          | 992672  | 2156073 |
| 57 | chr3:112273555-112335752 | PVRL3                                                                                                                          | 62198   | 967856  |
| 58 | chr3:139856923-139960875 | PIK3CB                                                                                                                         | 103953  | 119053  |
| 59 | chr3:141136897-141769320 | CLSTN2                                                                                                                         | 632424  | 569893  |
| 60 | chr4:30331135-30757519   | PCDH7                                                                                                                          | 426385  | 4812393 |
| 61 | chr4:126457017-126632372 | FAT4                                                                                                                           | 175356  | 1511696 |
| 62 | chr4:134289920-134332181 | PCDH10                                                                                                                         | 42262   | 4091750 |
| 63 | chr4:138659522-138673079 | PCDH18                                                                                                                         | 13558   | 2493606 |
| 64 | chr4:155375139-155531899 | DCHS2                                                                                                                          | 156761  | 398724  |
| 65 | chr4:187745932-187881981 | FAT                                                                                                                            | 136050  | 800924  |
| 66 | chr5:19508914-20017046   | CDH18                                                                                                                          | 508133  | 2257754 |
| 67 | chr5:21786911-22889488   | CDH12                                                                                                                          | 1102578 | 1846474 |
| 68 | chr5:24522967-24680668   | CDH10                                                                                                                          | 157702  | 1543437 |
| 69 | chr5:26916466-27074446   | CDH9                                                                                                                           | 157981  | 3140504 |
| 70 | chr5:31229553-31360994   | CDH6                                                                                                                           | 131442  | 2157439 |
| 71 | chr5:140146060-140372113 | PCDHA1,PCDHA10,PCDHA11,PCDH<br>A12,PCDHA13,PCDHA2,PCDHA3,PC<br>DHA4,PCDHA5,PCDHA6,PCDHA7,P<br>CDHA8,PCDHA9,PCDHAC1,PCDHA<br>C2 | 226054  | 131487  |
| 72 | chr5:140411163-140413696 | PCDHB1                                                                                                                         | 2534    | 40917   |
| 73 | chr5:140454421-140457146 | PCDHB2                                                                                                                         | 2726    | 25066   |
| 74 | chr5:140460418-140463589 | PCDHB3                                                                                                                         | 3172    | 11990   |
| 75 | chr5:140481765-140485385 | PCDHB4                                                                                                                         | 3621    | 11457   |
| 76 | chr5:140494984-140497887 | PCDHB5                                                                                                                         | 2904    | 6632    |
| 77 | chr5:140510023-140513050 | PCDHB6                                                                                                                         | 3028    | 13580   |
| 78 | chr5:140532427-140536140 | PCDHB7                                                                                                                         | 3714    | 10798   |
| 79 | chr5:140537614-140540203 | PCDHB8                                                                                                                         | 2590    | 1574    |
| 80 | chr5:140541164-140545979 | PCDHB16                                                                                                                        | 4816    | 3665    |

|    |                          |                                                                                                                                                                                    |        |        |
|----|--------------------------|------------------------------------------------------------------------------------------------------------------------------------------------------------------------------------|--------|--------|
| 81 | chr5:140547077-140551295 | PCDHB9                                                                                                                                                                             | 4219   | 3149   |
| 82 | chr5:140552136-140555397 | PCDHB10                                                                                                                                                                            | 3262   | 3291   |
| 83 | chr5:140559532-140562801 | PCDHB11                                                                                                                                                                            | 3270   | 4013   |
| 84 | chr5:140568475-140571880 | PCDHB12                                                                                                                                                                            | 3406   | 4275   |
| 85 | chr5:140573693-140577177 | PCDHB13                                                                                                                                                                            | 3485   | 4956   |
| 86 | chr5:140583262-140586042 | PCDHB14                                                                                                                                                                            | 2781   | 16195  |
| 87 | chr5:140605331-140607983 | PCDHB15                                                                                                                                                                            | 2653   | 30103  |
| 88 | chr5:140690436-140872730 | PCDHGA1,PCDHGA10,PCDHGA11,PCDHGA12,PCDHGA2,PCDHGA3,PCDHGA4,PCDHGA5,PCDHGA6,PCDHGA7,PCDHGA8,PCDHGA9,PCDHGB1,PCDHGB2,PCDHGB3,PCDHGB4,PCDHGB5,PCDHGB6,PCDHGB7,PCDHGC3,PCDHGC4,PCDHGC5 | 182295 | 82895  |
| 89 | chr5:141212867-141238128 | PCDH1                                                                                                                                                                              | 25262  | 142071 |
| 90 | chr5:141304715-141318811 | PCDH12                                                                                                                                                                             | 14097  | 16590  |
| 91 | chr5:150863847-150928698 | FAT2                                                                                                                                                                               | 64852  | 77084  |
| 92 | chr5:175908971-175955375 | PCLKC                                                                                                                                                                              | 46405  | 26765  |
| 93 | chr7:105390921-105461454 | FLJ23834                                                                                                                                                                           | 70534  | 116659 |
| 94 | chr8:95208568-95289986   | CDH17                                                                                                                                                                              | 81419  | 154833 |

**Supp. Fig. 1. Length of the locus in the human genome compared to the length of the noncoding DNA it contains.**

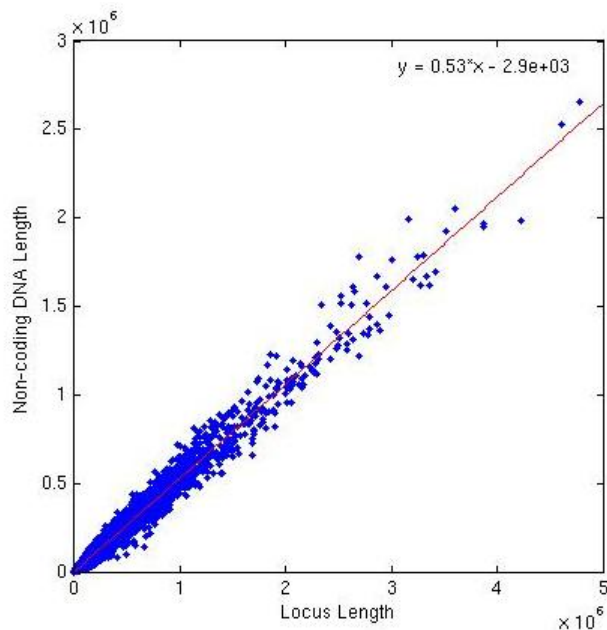

**Suppl. Fig. 2. The average number of GO categories that show up as significantly over- or under-represented in experiments with random sets of noncoding elements for different sample sizes. Locus boundaries were defined using TSS locations.**

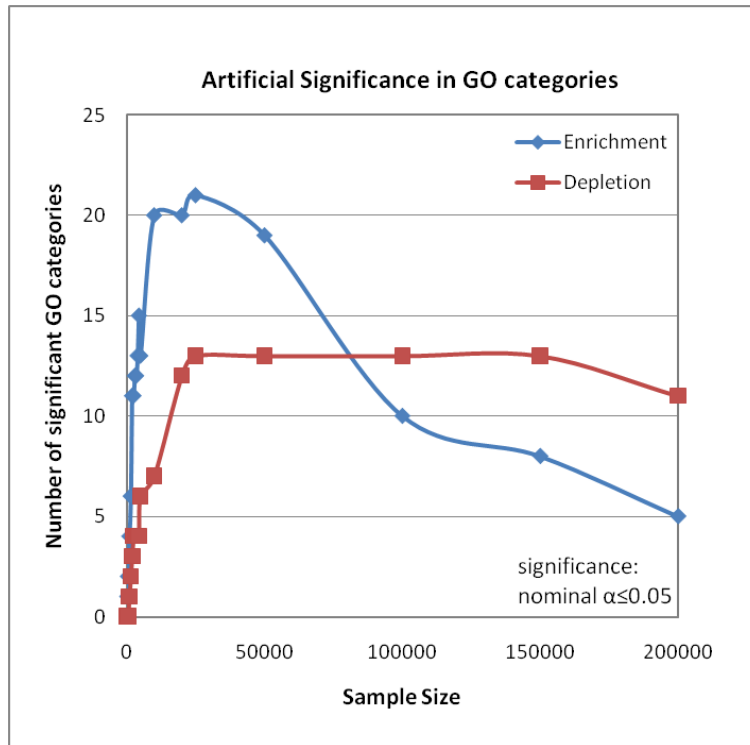

**Suppl. Fig. 3. Real probability  $\hat{p}_{GO}$  in the genome for each GO category, as a function of the number of loci associated to it.**

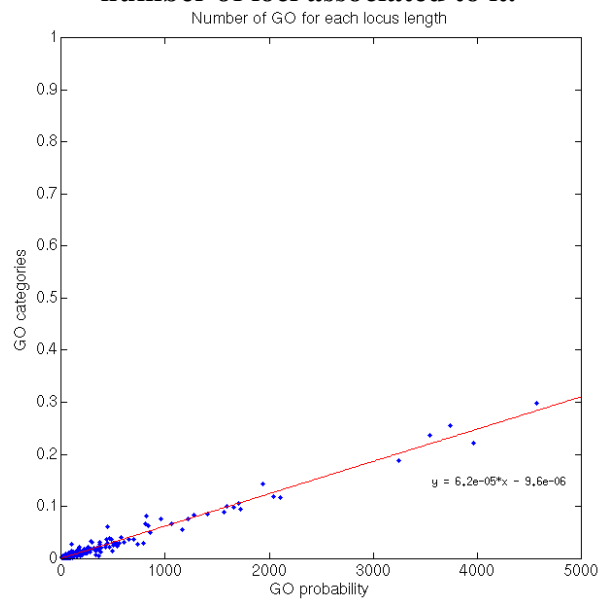

**Suppl. Fig. 4. Number of noncoding non-repetitive elements as a function of the repeat density of the locus.**

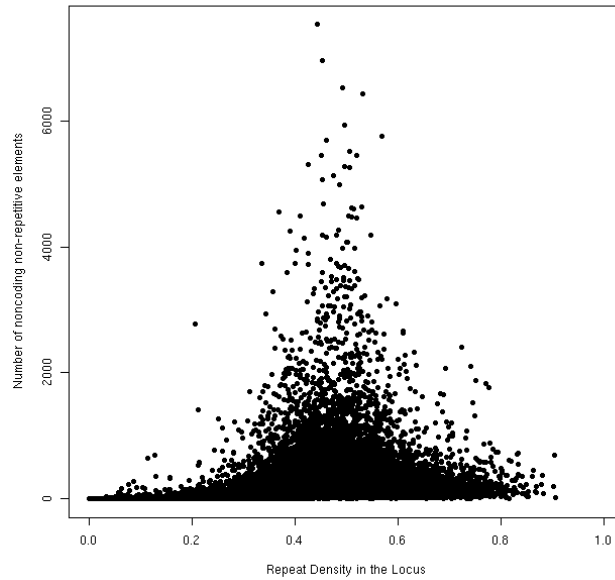

**Supp. Fig. 5. The function that samples noncoding DNA from the human genome (ncnr stands for noncoding non-repetitive elements).**

**Input:** *ncnr\_distribution* (ncnr elements probabilities, according to their length), sample size *n*

**Output:** sample of *n* ncnr elements

```

foreach Sample point i do
  u1 = rand();
  total = 0;
  index = 1;
  foreach ncnr element j do
    total = total + ncnr_distribution(j);
    if u1 < total then
      index = j;
      break;
    end
  end
  sample(i) = index - 1;
end

```
